# Supplementary material for: Identification of Mtb GlmU Uridyltransferase Domain Inhibitors by Ligand-Based and Structure-Based Drug Design Approaches
Source: MDPI journal article supplement (doi:10.3390/molecules27092805), 2022-04-28

## Supplementary information

**Figure S1:** Compounds from ligand optimization process

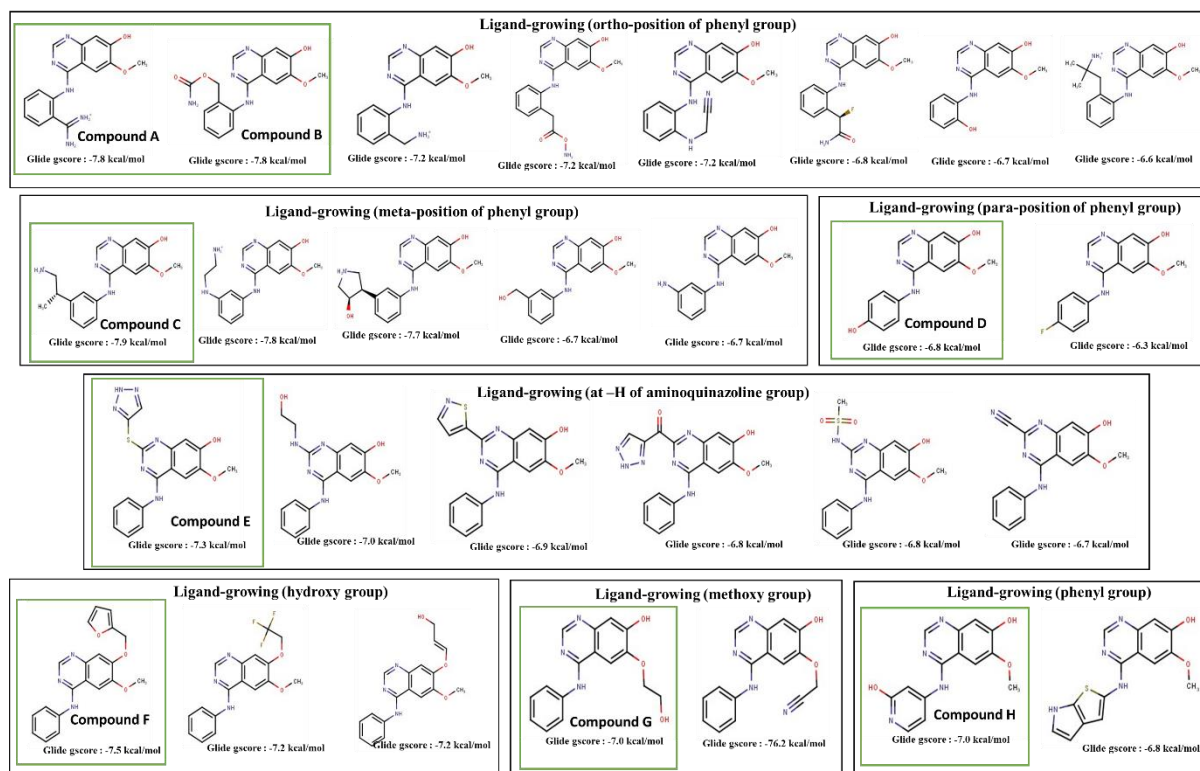

**Figure S2:** Binding poses of compound B, compound C, compound D, compound F, compound G and compound H

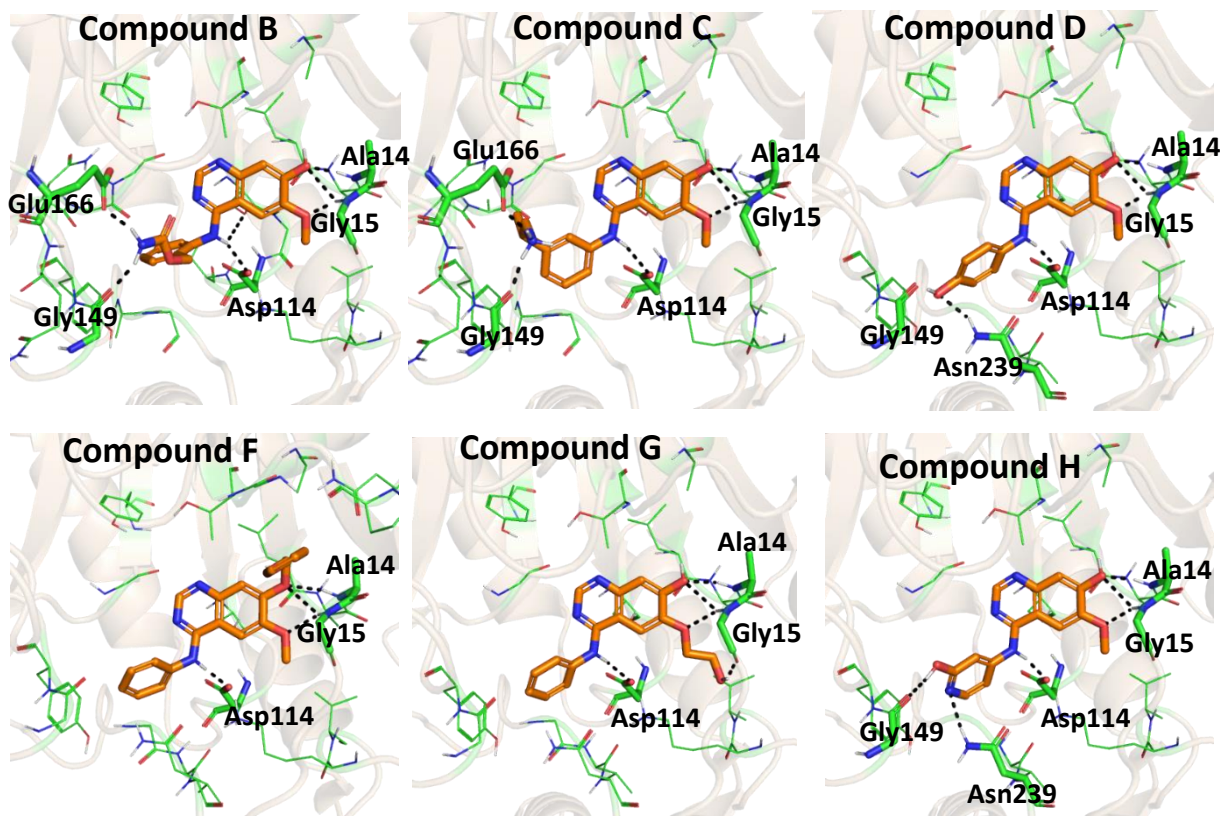

**Table S1:** Clustered known inhibitors, 28 from Tran et al., 2013 [2] and 7 from Soni et al., 2015 [13]; Compound ID is given as: first four digits publication year and last two digits compound number reported in the article. Highlighted in bold compounds were used as query structures for 2D similarity search

| S.No.    | Compound ID   | Structure                                                                           | % Inhibition at 50μM | Cluster  | S.No. | Compound ID | Structure                                                                             | % Inhibition at 50μM | Cluster |
|----------|---------------|-------------------------------------------------------------------------------------|----------------------|----------|-------|-------------|---------------------------------------------------------------------------------------|----------------------|---------|
| <b>1</b> | <b>201305</b> | 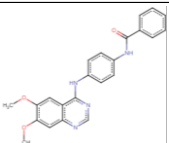   | <b>44%</b>           | <b>1</b> | 11    | 201326      |    | 13%                  | 1       |
| 2        | 201306        |    | 36%                  | 1        | 12    | 201327      |    | 16%                  | 1       |
| 3        | 201312        |    | 14%                  | 1        | 13    | 201328      |    | 18%                  | 1       |
| 4        | 201313        |   | 22%                  | 1        | 14    | 201329      |   | 21%                  | 1       |
| 5        | 201314        |  | 14%                  | 1        | 15    | 201330      |  | 35%                  | 1       |
| 6        | 201319        |  | 8%                   | 1        | 16    | 201331      |  | 38%                  | 1       |
| 7        | 201322        |  | 8%                   | 1        | 17    | 201333      |  | 17%                  | 1       |
| 8        | 201323        |  | 19%                  | 1        | 18    | 201335      |  | 34%                  | 1       |
| 9        | 201324        |  | 19%                  | 1        | 19    | 201336      |  | 38%                  | 1       |
| 10       | 201325        |  | 14%                  | 1        | 20    | 201337      |  | 30%                  | 1       |
|          |               |                                                                                     |                      |          | 21    | 201338      |  | 7%                   | 1       |

| S.No. | Compound ID | Structure                                                                           | % Inhibition at 20μM | Cluster |
|-------|-------------|-------------------------------------------------------------------------------------|----------------------|---------|
| 22    | 201503      | 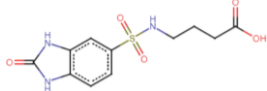   | ~21%                 | 2       |
| 23    | 201504      |    | ~50%                 | 3       |
| 24    | 201508      |    | ~20%                 | 3       |
| 25    | 201506      |    | ~51%                 | 4       |
| 26    | 201509      |   | ~41%                 | 5       |
| 27    | 201505      |  | ~41%                 | 6       |
| 28    | 201507      |  | ~41%                 | 6       |

**Figure S3:** MD simulations of a) Uridine docked in Apo form (3D98), b) Uridine docked in Glc-NAc-1-P bound form (4HCQ) and c) UD1 bound co-crystal structure (4G3Q)

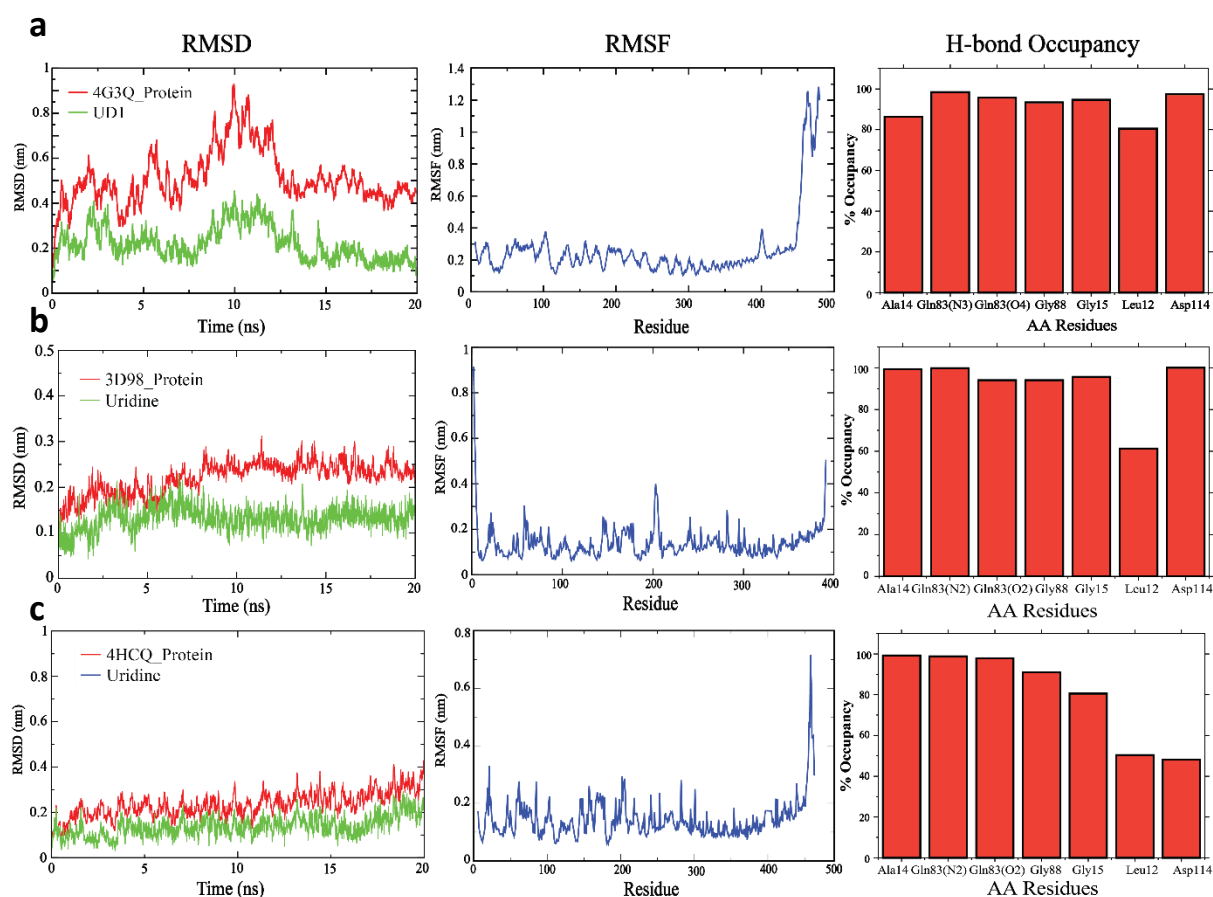

**Figure S4a:** Putative binding poses of VS hits ZINC000015107678, ZINC000000485734, and ZINC000003279388, b) MD simulation of ZINC000015107678, ZINC000000485734, and ZINC000003279388 for 20ns

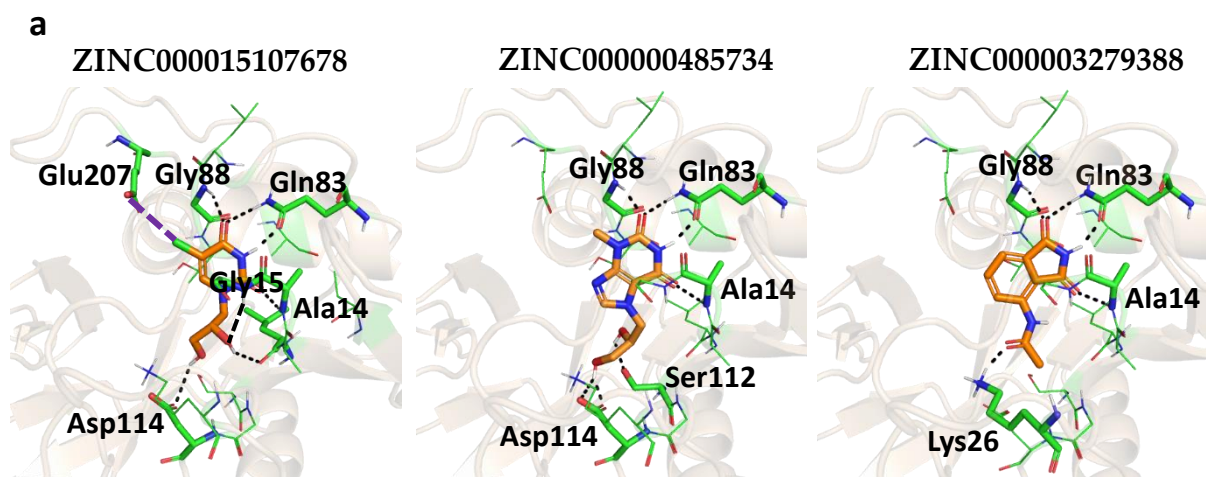

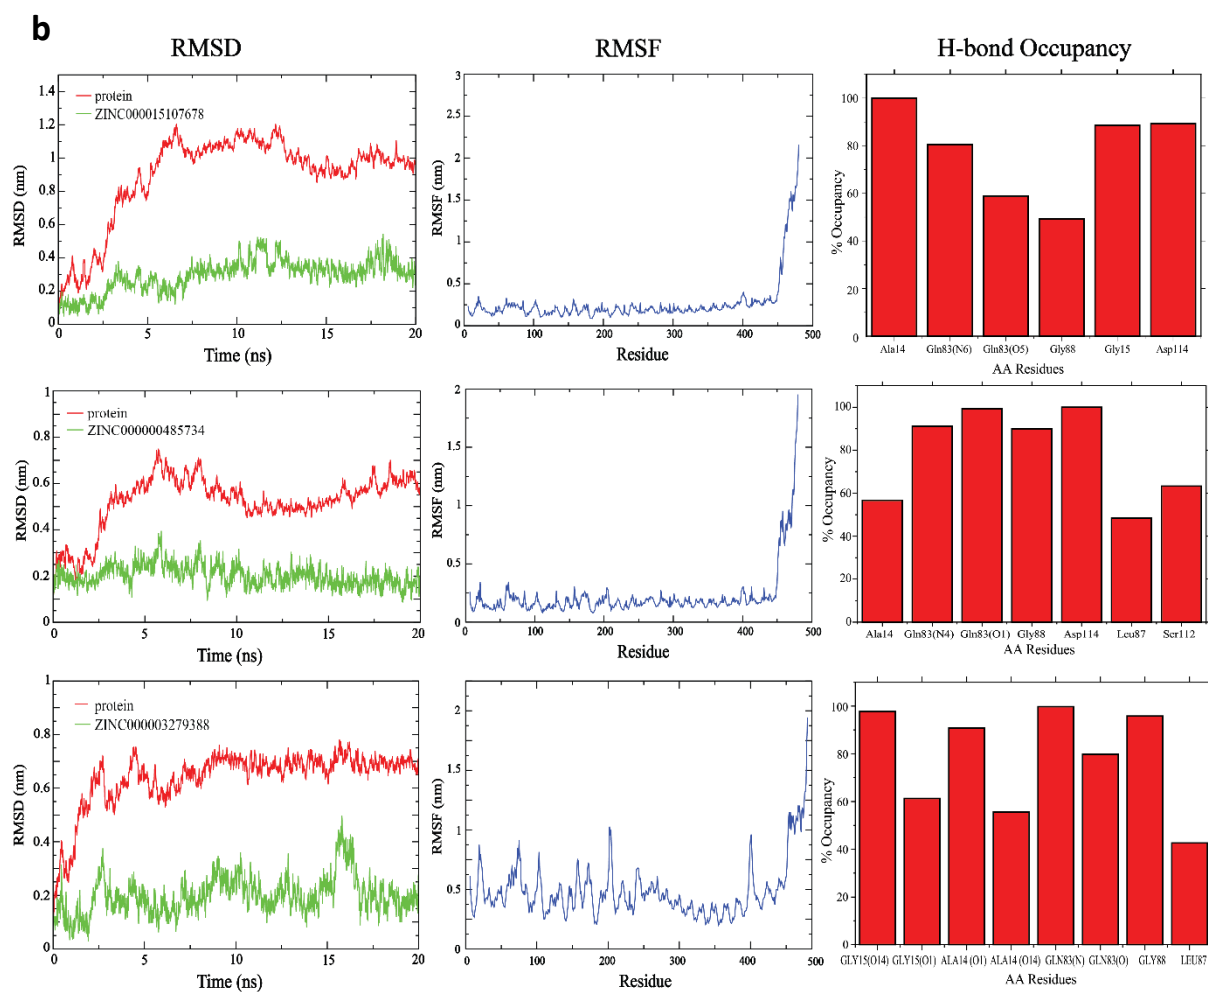

**Figure S5:** Overlay of the three VS ZINC000015107678, ZINC000000485734, and ZINC000003279388, in human AGX1 (PDB ID: 1JV1). Ugly clashes are shown in red color.

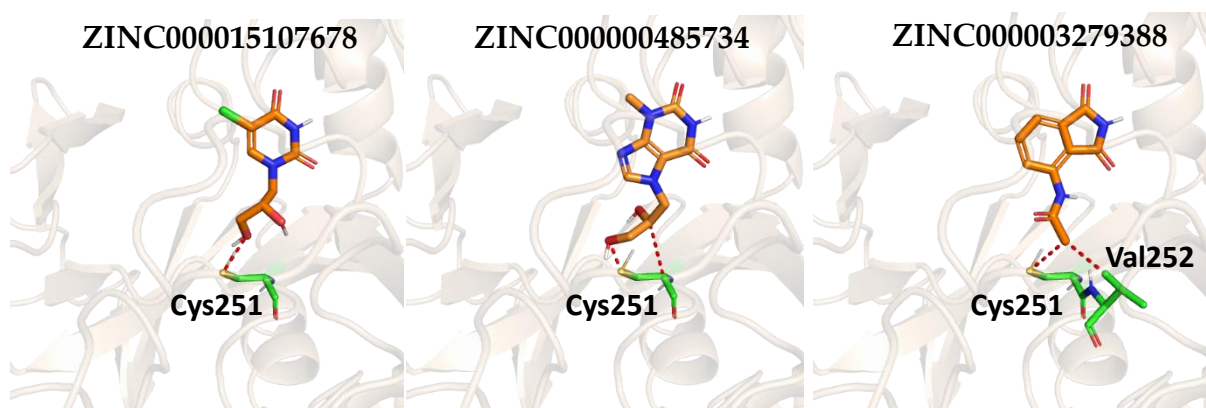

Supplement: s1 [file s1]
